# Supplementary material
Source: PubMed Central journal article supplement (PMC5585698)
Supplement: CVI.00067-17_zcd999095510s1.pdf [file CVI.00067-17_zcd999095510s1.pdf]

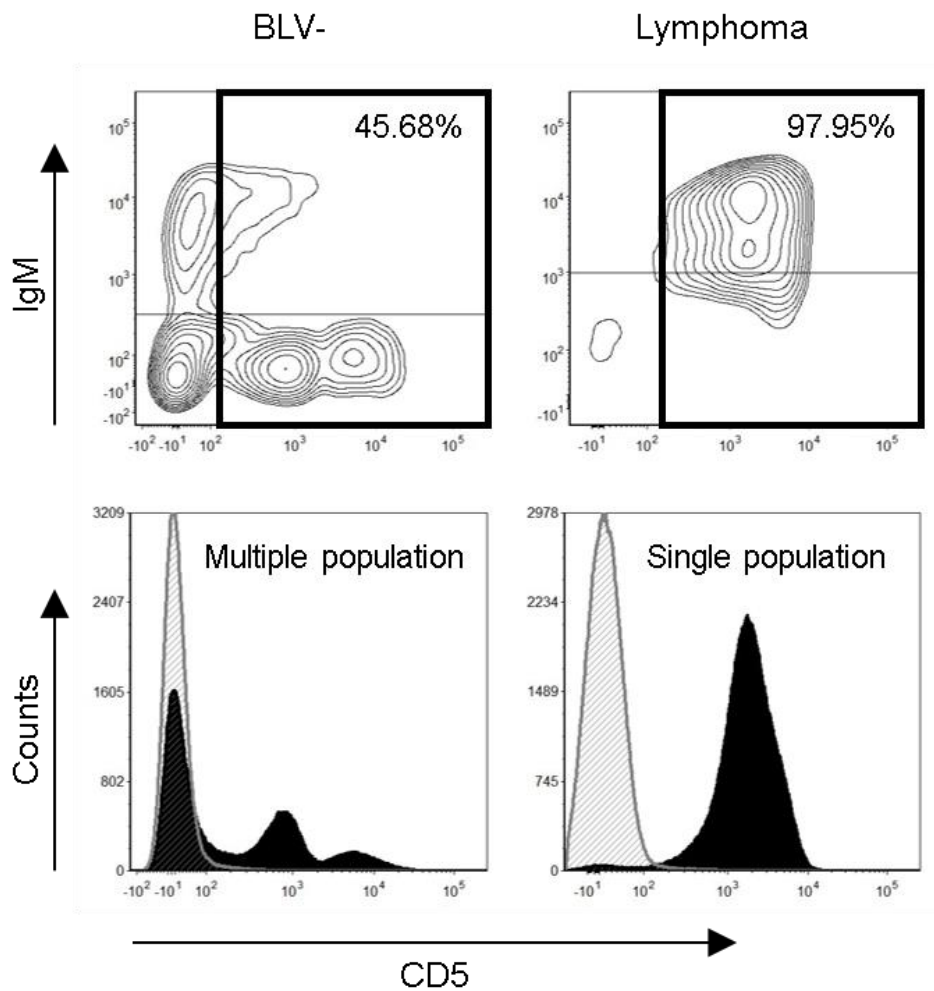

1

2 **FIG S1** Flow cytometry analysis to assess cell-marker expression and population  
 3 diversity. Cell-marker expression of peripheral blood mononuclear cells from bovine  
 4 leukemia virus-uninfected cattle or cattle with lymphoma was analyzed by flow  
 5 cytometry. The results were evaluated as percentages of positive cells and numbers of  
 6 different cell populations.

7

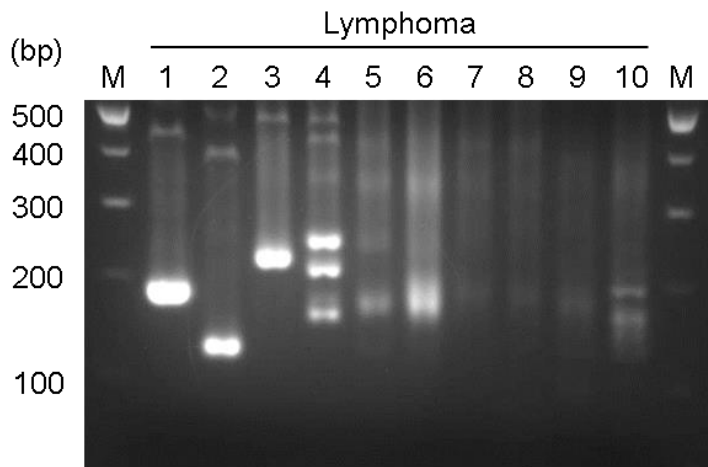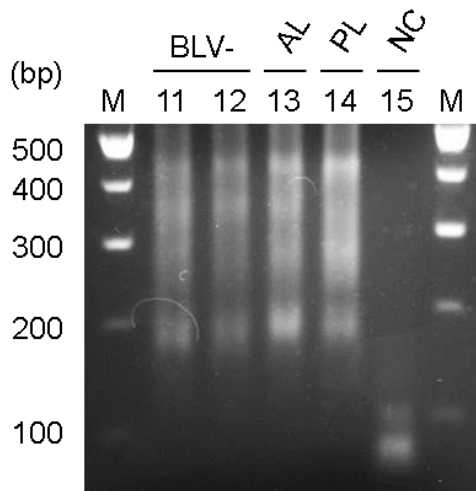

8

9 **FIG S2** PCR-based IgH analysis to confirm B-cell clonality. Amplification of the gene  
 10 encoding the IgH region of interest was performed using DNA extracted from peripheral  
 11 blood mononuclear cells (PBMCs) and tissue samples of cattle with or without  
 12 lymphoma. Representative PCR products run on an ethidium bromide-stained 3% Tris-  
 13 borate-EDTA agarose gel. Lane: 1, PBMCs; 2, solid tumor in heart; 3, superficial  
 14 cervical lymph node; 4, PBMCs; 5, solid tumor in heart; 6–8, PBMCs; 9, solid mass in  
 15 rib bone; 10, solid tumor in thymus; 11–14, PBMCs; 15, double-distilled water; M, 100-  
 16 bp DNA ladder; AL, aleukemic; PL, persistent lymphocytosis; NC, negative control.

17

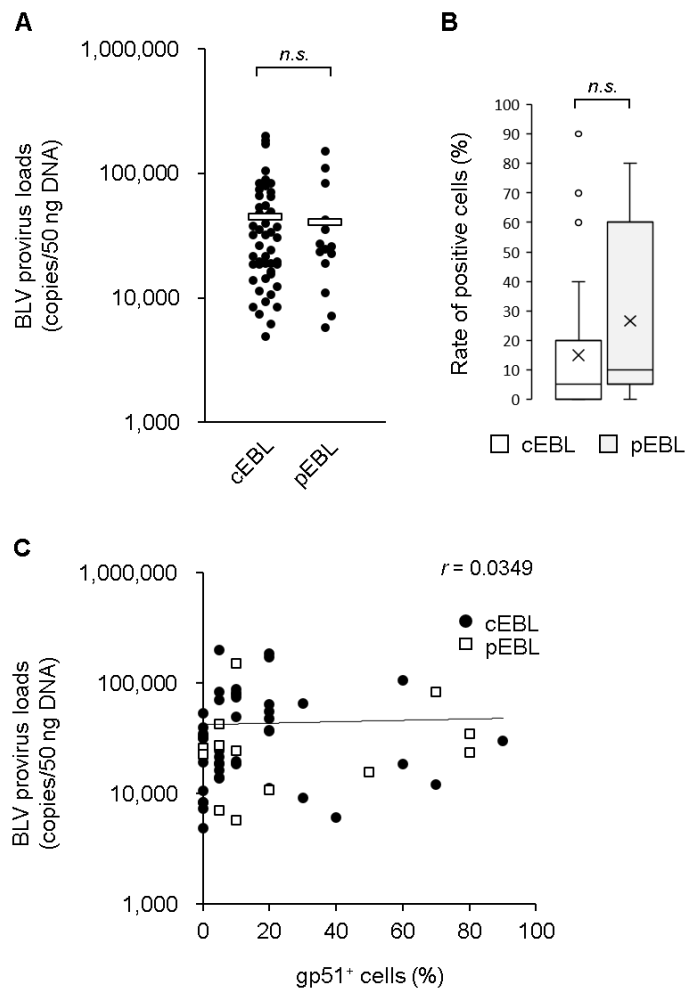

18

19 **FIG S3** Difference in viral replication between two B-cell lymphomas. (A) Bovine  
 20 leukemia virus (BLV) provirus loads were compared between the samples from classic  
 21 enzootic bovine leukosis (cEBL;  $n = 42$ ), polyclonal EBL (pEBL;  $n = 15$ ).  $P = 0.7105$ ,  
 22 Wilcoxon rank sum test. (B) The expression levels of gp51 in cEBL ( $n = 41$ ) and pEBL  
 23 ( $n = 13$ ) are shown as box-and-whisker plots. Each box indicates median, lower and  
 24 upper quartiles, and whiskers indicate lower and upper extremes. The x-mark indicates  
 25 the average, and dots represent outliers that are much greater than normal or much less  
 26 than normal.  $P = 0.2236$ , Wilcoxon rank sum test. (C) Correlation between the BLV  
 27 provirus loads and the positive percentages of gp51 expression.  $R = 0.0349$ .

28

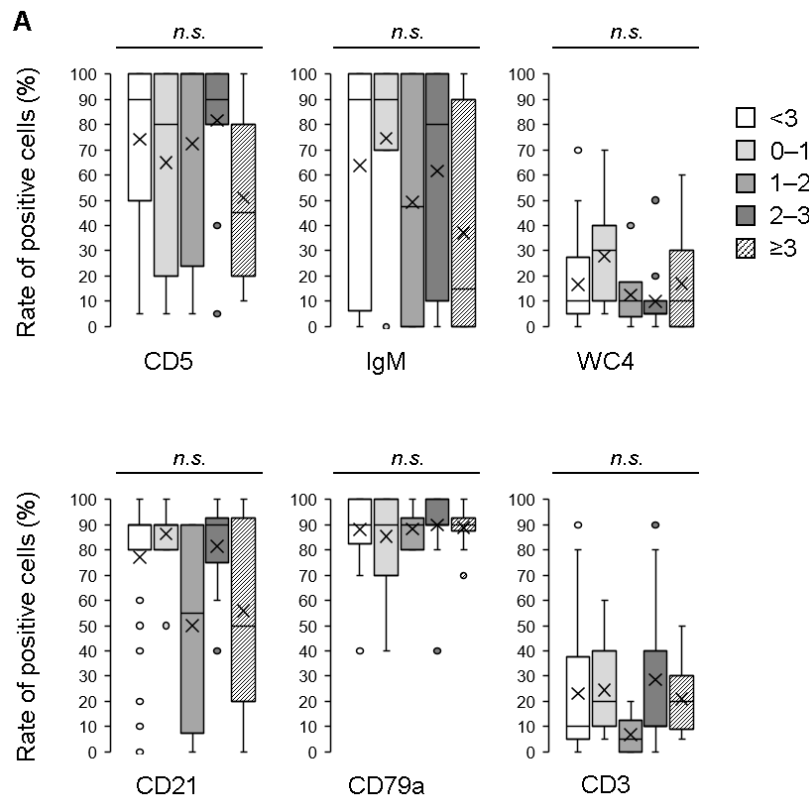

29

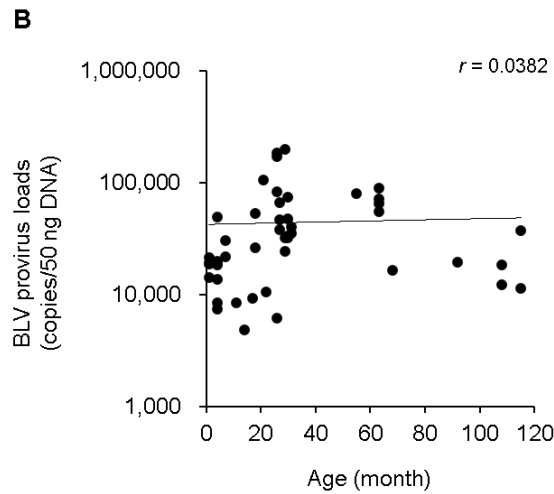

30

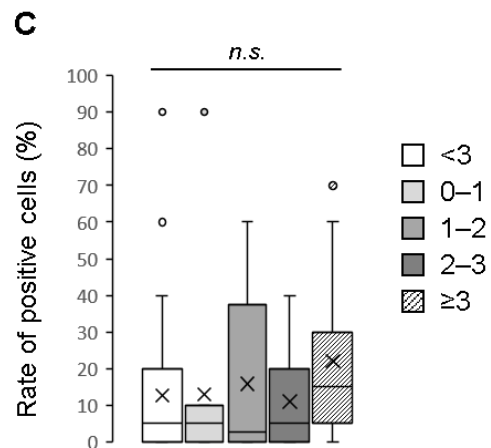

31 **FIG S4** Difference in cell-marker expression and viral replication during early onset of  
 32 classic enzootic bovine leukosis (cEBL). (A) The expression levels of six cell markers  
 33 in the samples from different ages of cEBL cattle are shown as box-and-whisker plots.  
 34 Each box indicates median, lower and upper quartiles, and whiskers indicate lower and  
 35 upper extremes. The x-mark indicates the average, and dots represent outliers that are

36 much greater than normal or much less than normal. (B) Correlation between the bovine  
37 leukemia virus provirus loads and the age in months of cEBL cattle,  $R = 0.0382$ . (C)  
38 The expression levels of gp51 in the samples from different ages of cEBL cattle are  
39 shown as box-and-whisker plots. Numbers indicate age in years of original cattle in  
40 each sample.  $<3$ ,  $n = 32$  (0–1,  $n = 11$ ; 1–2,  $n = 6$ ; 2–3,  $n = 15$ );  $\geq 3$ ,  $n = 10$ .

41
